# Supplementary material for: Risperidone long-acting in-situ microimplant in the acute management of manic episodes with psychotic symptoms in non-adherent patients with schizoaffective disorder: a retrospective real-world study
Source: Research Square preprint supplement (doi:10.21203/rs.3.rs-8503226/v1), 2026-01-12
Supplement: Supplementary file 1 [file 3dd8488788df890b7ef48ea0.docx]

Supplementary

*P-values < 0.0001 are reported as ‘< 0.0001’; all other p-values are rounded to three decimal places.*

**Supplementary Table S1A. LS-means for YMRS total score by timepoint (unadjusted mixed model)**

Linear mixed-effects model with time (Tx, T0, T1, T2, T3, T4, T5) as categorical fixed effect (Tx reference) and random intercept for patient; REML estimation.

| Time | LS-mean YMRS | SE | 95% CI lower | 95% CI upper |
| --- | --- | --- | --- | --- |
| Tx | 31.98 | 0.85 | 30.31 | 33.65 |
| T0 | 26.58 | 0.85 | 24.91 | 28.25 |
| T1 | 21.56 | 0.85 | 19.89 | 23.23 |
| T2 | 19.00 | 0.85 | 17.33 | 20.67 |
| T3 | 8.74 | 0.85 | 7.07 | 10.41 |
| T4 | 5.90 | 0.85 | 4.23 | 7.57 |
| T5 | 6.18 | 0.85 | 4.51 | 7.85 |

**Supplementary Table S1B. Prespecified pairwise contrasts of LS-means for YMRS total score (unadjusted mixed model)**

Same model as in S1A. Contrasts are B−A (later time minus earlier time). Wald tests with normal approximation; Holm–Bonferroni adjustment across the six contrasts.

| Contrast | LS-mean difference (B−A) | SE | 95% CI lower | 95% CI upper | p-value | Holm-adjusted p-value |
| --- | --- | --- | --- | --- | --- | --- |
| Tx vs T0 | −5.40 | 0.90 | −7.16 | −3.64 | < 0.0001 | < 0.0001 |
| T0 vs T1 | −5.02 | 0.90 | −6.78 | −3.26 | < 0.0001 | < 0.0001 |
| T0 vs T2 | −7.58 | 0.90 | −9.34 | −5.82 | < 0.0001 | < 0.0001 |
| T2 vs T3 | −10.26 | 0.90 | −12.02 | −8.50 | < 0.0001 | < 0.0001 |
| T3 vs T4 | −2.84 | 0.90 | −4.60 | −1.08 | 0.002 | 0.003 |
| T4 vs T5 | 0.28 | 0.90 | −1.48 | 2.04 | 0.755 | 0.755 |

**Supplementary Table S1C. Covariate-adjusted LS-means and prespecified contrasts for YMRS total score (sensitivity analysis)**

Linear mixed-effects model with time (Tx, T0, T1, T2, T3, T4, T5) as categorical fixed effect (Tx reference), baseline age, sex (SEX), BMI, lithium use (LITHIUM_any) and any valproate use (VALPROATE_any) as additional fixed effects, and random intercept for patient; REML estimation. LS-means evaluated at the sample means of covariates.

*S1C – Part 1. Covariate-adjusted LS-means for YMRS total score by timepoint*

| Time | LS-mean YMRS | SE | 95% CI lower | 95% CI upper |
| --- | --- | --- | --- | --- |
| Tx | 31.98 | 0.85 | 30.31 | 33.65 |
| T0 | 26.58 | 0.85 | 24.91 | 28.25 |
| T1 | 21.56 | 0.85 | 19.89 | 23.23 |
| T2 | 19.00 | 0.85 | 17.33 | 20.67 |
| T3 | 8.74 | 0.85 | 7.07 | 10.41 |
| T4 | 5.90 | 0.85 | 4.23 | 7.57 |
| T5 | 6.18 | 0.85 | 4.51 | 7.85 |

*S1C – Part 2. Covariate-adjusted prespecified pairwise contrasts of LS-means for YMRS total score*

| Contrast | LS-mean difference (B−A) | SE | 95% CI lower | 95% CI upper | p-value | Holm-adjusted p-value |
| --- | --- | --- | --- | --- | --- | --- |
| Tx vs T0 | −5.40 | 0.90 | −7.16 | −3.64 | < 0.0001 | < 0.0001 |
| T0 vs T1 | −5.02 | 0.90 | −6.78 | −3.26 | < 0.0001 | < 0.0001 |
| T0 vs T2 | −7.58 | 0.90 | −9.34 | −5.82 | < 0.0001 | < 0.0001 |
| T2 vs T3 | −10.26 | 0.90 | −12.02 | −8.50 | < 0.0001 | < 0.0001 |
| T3 vs T4 | −2.84 | 0.90 | −4.60 | −1.08 | 0.002 | 0.003 |
| T4 vs T5 | 0.28 | 0.90 | −1.48 | 2.04 | 0.755 | 0.755 |

**Supplementary Table S2A. LS-means for CGI-BP severity score by timepoint (unadjusted mixed model)**

*Linear mixed-effects model with time (Tx, T0, T1, T2, T3, T4, T5) as categorical fixed effect (Tx reference) and random intercept for patient; REML estimation.*

| Time | LS-mean CGI-BP | SE | 95% CI lower | 95% CI upper |
| --- | --- | --- | --- | --- |
| Tx | 5.70 | 0.15 | 5.40 | 6.00 |
| T0 | 5.12 | 0.15 | 4.82 | 5.42 |
| T1 | 4.54 | 0.15 | 4.24 | 4.84 |
| T2 | 4.26 | 0.15 | 3.96 | 4.56 |
| T3 | 3.66 | 0.15 | 3.36 | 3.96 |
| T4 | 3.10 | 0.15 | 2.80 | 3.40 |
| T5 | 2.84 | 0.15 | 2.54 | 3.14 |

**Supplementary Table S2B. Prespecified pairwise contrasts of LS-means for CGI-BP severity score (unadjusted mixed model)**

*Same model as in S2A. Contrasts are B−A (later time minus earlier time). Wald tests with normal approximation; Holm–Bonferroni adjustment across the four contrasts.*

| Contrast | LS-mean difference (B−A) | SE | 95% CI lower | 95% CI upper | p-value | Holm-adjusted p-value |
| --- | --- | --- | --- | --- | --- | --- |
| Tx vs T0 | −0.58 | 0.12 | −0.82 | −0.34 | < 0.0001 | < 0.0001 |
| T0 vs T2 | −0.86 | 0.12 | −1.10 | −0.62 | < 0.0001 | < 0.0001 |
| T2 vs T3 | −0.60 | 0.12 | −0.84 | −0.36 | < 0.0001 | < 0.0001 |
| T3 vs T4 | −0.56 | 0.12 | −0.80 | −0.32 | < 0.0001 | < 0.0001 |

**Supplementary Table S2C. Covariate-adjusted LS-means and prespecified contrasts for CGI-BP severity score (sensitivity analysis)**

Linear mixed-effects model with time (Tx, T0, T1, T2, T3, T4, T5) as categorical fixed effect (Tx reference), baseline age, sex (SEX), BMI, any lithium use (LITHIUM_any) and any valproate use (VALPROATE_any) as additional fixed effects, and random intercept for patient; REML estimation. LS-means evaluated at the sample means of covariates.

***S2C – Part 1. Covariate-adjusted LS-means for CGI-BP severity score by timepoint***

| Time | LS-mean CGI-BP | SE | 95% CI lower | 95% CI upper |
| --- | --- | --- | --- | --- |
| Tx | 5.70 | 0.15 | 5.40 | 6.00 |
| T0 | 5.12 | 0.15 | 4.82 | 5.42 |
| T1 | 4.54 | 0.15 | 4.24 | 4.84 |
| T2 | 4.26 | 0.15 | 3.96 | 4.56 |
| T3 | 3.66 | 0.15 | 3.36 | 3.96 |
| T4 | 3.10 | 0.15 | 2.80 | 3.40 |
| T5 | 2.84 | 0.15 | 2.54 | 3.14 |

*S2C – Part 2. Covariate-adjusted prespecified pairwise contrasts of LS-means for CGI-BP severity score*

| Contrast | LS-mean difference (B−A) | SE | 95% CI lower | 95% CI upper | p-value | Holm-adjusted p-value |
| --- | --- | --- | --- | --- | --- | --- |
| Tx vs T0 | −0.58 | 0.12 | −0.82 | −0.34 | < 0.0001 | < 0.0001 |
| T0 vs T2 | −0.86 | 0.12 | −1.10 | −0.62 | < 0.0001 | < 0.0001 |
| T2 vs T3 | −0.60 | 0.12 | −0.84 | −0.36 | < 0.0001 | < 0.0001 |
| T3 vs T4 | −0.56 | 0.12 | −0.80 | −0.32 | < 0.0001 | < 0.0001 |
